# Supplementary material
Source: PubMed Central journal article supplement (PMC5569302)
Supplement: NIHMS889179-supplement-supplement_1.pdf [file NIHMS889179-supplement-supplement_1.pdf]

## APPENDIX

eTable.

### Summary of Complex LM/LMM Cases

| Patient | Age, y/<br>Sex | Site              | Follow-up, mo/<br>Status at Last Visit | Lesion Size/Initial Biopsy Depth                    | Challenging Factors                                                                                                                                                                                                                      | Impact of HRCM                                                                                                                                                                                                                                         |
|---------|----------------|-------------------|----------------------------------------|-----------------------------------------------------|------------------------------------------------------------------------------------------------------------------------------------------------------------------------------------------------------------------------------------------|--------------------------------------------------------------------------------------------------------------------------------------------------------------------------------------------------------------------------------------------------------|
| 1       | 82/F           | Forehead          | 7/NER                                  | 1.0×0.5 cm/0.54 mm (transected)                     | Invasive to 0.54 mm (transected); prior treatment with cryotherapy and laser; ill-defined borders; field photodamage; actual lesion size on HRCM was >4 cm                                                                               | Guided mapping biopsies; identified areas of invasion; 0.95-mm depth; mapped LM intraoperatively with extension of standard surgical margins; LMM removed in 1 stage                                                                                   |
| 2       | 88/F           | Cheek             | 6/stable disease                       | 2.5×2.3 cm/0.2 mm                                   | Multiple comorbidities; poor surgical candidate; lesion within 1 cm of oral commissure; occult invasion to 1.2 mm; extensive subclinical extension                                                                                       | HRCM detected areas of deeper invasion; HRCM used to determine extent of nonsurgical (radiation and imiquimod) treatment field; longitudinally monitored nonsurgical treatment; detected areas of subclinical early melanoma in situ at 6-mo follow-up |
| 3       | 78/M           | Preauricular area | 12/NER                                 | 1.2×1.3 cm/1.3 mm                                   | Invasive to 1.3 mm; 8 mitoses/mm <sup>2</sup> ; surgical margins encroaching onto tragus; subclinical extension on HRCM                                                                                                                  | Confocal map used to plan surgery; extended margins beyond standard surgical margins up to 1.5 cm; lesion removed in 1 stage                                                                                                                           |
| 4       | 62/M           | Cheek             | 6/NER                                  | Field of clinical suspicion/no biopsy was performed | History of invasive melanoma (1.7 mm) previously treated with 8 surgeries; recurrence within graft from lateral abdomen placed on cheek; cosmetically/functionally sensitive location                                                    | Guided mapping biopsies; 8/8 suspicious on HRCM for LM confirmed on histology; preoperatively mapped lesion for surgery; monitored topical imiquimod response                                                                                          |
| 5       | 85/F           | Cheek             | 3/NER                                  | Multiple suspicious foci/no biopsy was performed    | Poor surgical candidate; 8 prior melanomas; prior LM with extensive adnexal involvement excised 15 years prior; recurrent LMM along hypopigmented scar; extensive lesion with vague boundaries previously treated with topical imiquimod | Assess response to imiquimod; guided mapping biopsies; 4/4 positive for melanoma, with 1 invasive to 0.2 mm; guided debulking of invasive portion; removed in 1 stage                                                                                  |

Abbreviations: LM, lentigo maligna; LMM, lentigo maligna melanoma; HRCM, handheld reflectance confocal microscopy; F, female; NER, no evidence of recurrence; M, male.
